# Supplementary material for: Antibody expressing pea seeds as fodder for prevention of gastrointestinal parasitic infections in chickens
Source: PubMed Central journal article supplement (PMC2755478; doi:10.1186/1472-6750-9-79), 2009-09-11
Supplement: 1472-6750-9-79-S2.pdf [file 1472-6750-9-79-S2.pdf]

**Additional file 2.** Analyses of independent AB28 F<sub>0</sub> pea lines.

| <b>No. independent F<sub>0</sub><br/>line</b> | <b>Basta-selection</b> | <b>PCR</b> | <b>Western blot<br/>analysis (His-tag) of<br/>F<sub>1</sub> seeds</b> |
|-----------------------------------------------|------------------------|------------|-----------------------------------------------------------------------|
| 1                                             | (-)                    | (-)        | (-)                                                                   |
| 2                                             | (+)                    | (-)        | (-)                                                                   |
| 3                                             | (+)                    | (-)        | (-)                                                                   |
| 4                                             | (+)                    | (-)        | (-)                                                                   |
| 5                                             | (+)                    | (-)        | (-)                                                                   |
| 6                                             | (+)                    | (-)        | (-)                                                                   |
| 7                                             | (+)                    | (-)        | (-)                                                                   |
| 8                                             | (-)                    | (-)        | (-)                                                                   |
| 9*                                            | (+)                    | (+)        | (+)                                                                   |
| 10                                            | (+)                    | (-)        | (-)                                                                   |

\*Line 9 has been selected for further work. (-), negative; (+), positive.
