# Supplementary material for: Antibody expressing pea seeds as fodder for prevention of gastrointestinal parasitic infections in chickens
Source: PubMed Central journal article supplement (PMC2755478; doi:10.1186/1472-6750-9-79), 2009-09-11
Supplement: 1472-6750-9-79-S3.pdf [file 1472-6750-9-79-S3.pdf]

**Additional file 3.** Analyses of F<sub>1</sub> seeds derived from AB28 F<sub>0</sub> pea line 9.

| <b>F<sub>1</sub> seed No.</b> | <b>PCR</b> | <b>Western blot analysis (His-tag)<br/>of F<sub>1</sub> seeds</b> |
|-------------------------------|------------|-------------------------------------------------------------------|
| 1                             | (+)        | (+)                                                               |
| 2                             | (-)        | (-)                                                               |
| 3                             | (+)        | (+)                                                               |
| 4                             | (+)        | n.d.                                                              |
| 5                             | (+)        | (+)                                                               |
| 6                             | (-)        | (-)                                                               |
| 7                             | (+)        | (+)                                                               |
| 8                             | (+)        | (+)                                                               |
| 9                             | (+)        | (+)                                                               |
| 10                            | (+)        | (+)                                                               |
| 11                            | (+)        | (+)                                                               |
| 12                            | (+)        | n.d.                                                              |
| 13                            | (-)        | (-)                                                               |

(-), negative; (+), positive; n.d., not determined.
