# Supplementary material for: Antibody expressing pea seeds as fodder for prevention of gastrointestinal parasitic infections in chickens
Source: PubMed Central journal article supplement (PMC2755478; doi:10.1186/1472-6750-9-79), 2009-09-11
Supplement: 1472-6750-9-79-S4.pdf [file 1472-6750-9-79-S4.pdf]

**Additional file 4.** Results of analyses of the progeny of F<sub>1</sub> lines 9/9, 9/10, 9/11 and 9/13.

| No. F <sub>1</sub> pea line | F <sub>2</sub> seeds | Western blot analysis (His-tag) of F <sub>2</sub> seeds | Comment             |
|-----------------------------|----------------------|---------------------------------------------------------|---------------------|
| <b>9/9*</b>                 | 1                    | (+)                                                     | <b>homozygous</b>   |
|                             | 2                    | (+)                                                     |                     |
|                             | 3                    | (+)                                                     |                     |
|                             | 4                    | (+)                                                     |                     |
|                             | 5                    | (+)                                                     |                     |
|                             | 6                    | (+)                                                     |                     |
| <b>9/10</b>                 | 1                    | (+)                                                     | <b>heterozygous</b> |
|                             | 2                    | (-)                                                     |                     |
|                             | 3                    | (+)                                                     |                     |
|                             | 4                    | (+)                                                     |                     |
|                             | 5                    | (+)                                                     |                     |
|                             | 6                    | (-)                                                     |                     |
| <b>9/11</b>                 | 1                    | (+)                                                     | <b>heterozygous</b> |
|                             | 2                    | (+)                                                     |                     |
|                             | 3                    | (-)                                                     |                     |
|                             | 4                    | (+)                                                     |                     |
|                             | 5                    | (-)                                                     |                     |
|                             | 6                    | (+)                                                     |                     |
| <b>9/13</b>                 | 1                    | (-)                                                     | <b>negative</b>     |
|                             | 2                    | (-)                                                     |                     |
|                             | 3                    | (-)                                                     |                     |
|                             | 4                    | (-)                                                     |                     |

\*For line 9/9, 16 tested seeds were positive. (-), negative; (+), positive.
