# Supplementary material for: Antibody expressing pea seeds as fodder for prevention of gastrointestinal parasitic infections in chickens
Source: PubMed Central journal article supplement (PMC2755478; doi:10.1186/1472-6750-9-79), 2009-09-11
Supplement: 1472-6750-9-79-S5.pdf [file 1472-6750-9-79-S5.pdf]

**Additional file 5.** Characterization of purified scFv AB28 produced in pea seeds.

**(a)**

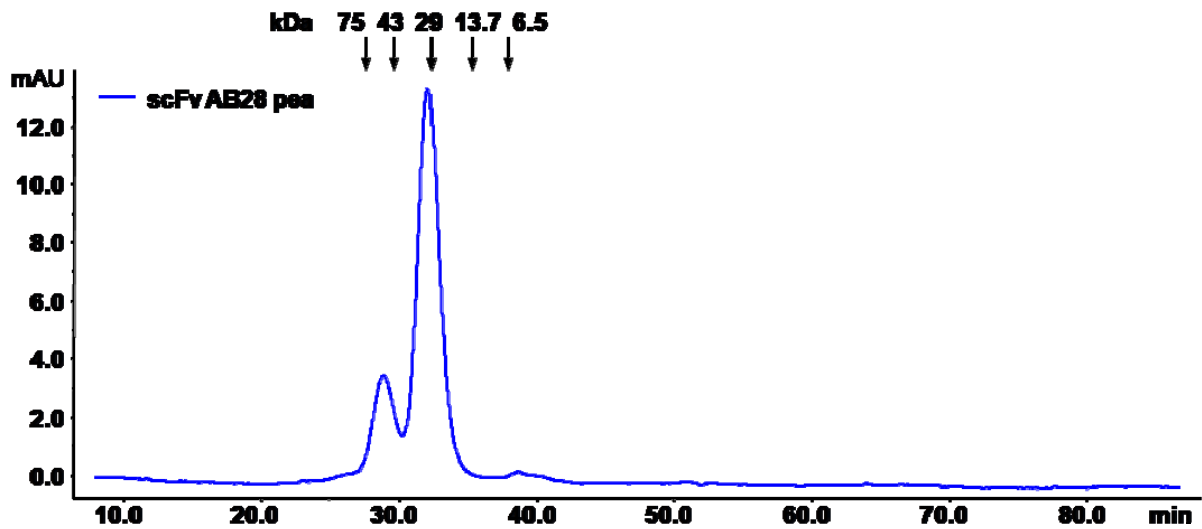

**(b)**

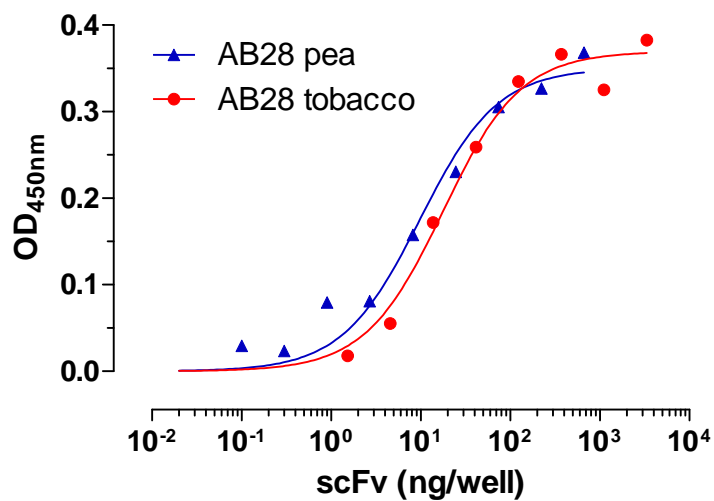

**(a)** Analysis of the molecular forms by size-exclusion FPLC on a calibrated Superdex 200 column. The positions of the molecular weight markers are indicated. **(b)** Head-to-head comparison of the antigen-binding activities of the scFv AB28 preparations isolated either from the tobacco leaves or from the transgenic pea seeds, as measured by ELISA.
