# Supplementary material for: Antibody expressing pea seeds as fodder for prevention of gastrointestinal parasitic infections in chickens
Source: PubMed Central journal article supplement (PMC2755478; doi:10.1186/1472-6750-9-79), 2009-09-11
Supplement: 1472-6750-9-79-S7.pdf [file 1472-6750-9-79-S7.pdf]

**Additional file 7.** Feed consumption and antibody uptake in chickens.

| <b>Age</b> | <b>Day of feeding</b> | <b>Average feed consumption (g)</b> | <b>Pea content (g)</b> | <b>Average antibody uptake (mg/bird*d)</b> | <b>Average body weight (g)</b> | <b>Average antibody uptake (mg/kg bw*d)</b> |
|------------|-----------------------|-------------------------------------|------------------------|--------------------------------------------|--------------------------------|---------------------------------------------|
| Day 9      | Day 1                 | 23.70                               | 2.37                   | 4.17                                       | 114.62                         | 36.39                                       |
| Day 10     | Day 2                 | 24.70                               | 2.47                   | 4.35                                       | 127.94                         | 33.97                                       |
| Day 11     | Day 3                 | 26.43                               | 2.64                   | 4.65                                       | 143.17                         | 32.49                                       |
| Day 12     | Day 4                 | 32.63                               | 3.26                   | 5.74                                       | 155.80                         | 36.86                                       |
| Day 13     | Day 5                 | 37.68                               | 3.77                   | 6.63                                       | 174.08                         | 38.09                                       |
| Day 14     | Day 6                 | 40.58                               | 4.06                   | 7.14                                       | 194.12                         | 36.79                                       |
| Day 15     | Day 7                 | 41.70                               | 4.17                   | 7.34                                       | 214.48                         | 34.22                                       |
| Day 16     | Day 8                 | 47.81                               | 4.78                   | 8.41                                       | 232.44                         | 36.20                                       |

The calculations are based on the determined AB28-content of 1.76 mg extractable functional scFv AB28 per 1 g dry seed weight.
