# Supplementary material for: Antibody expressing pea seeds as fodder for prevention of gastrointestinal parasitic infections in chickens
Source: PubMed Central journal article supplement (PMC2755478; doi:10.1186/1472-6750-9-79), 2009-09-11
Supplement: 1472-6750-9-79-S8.pdf [file 1472-6750-9-79-S8.pdf]

**Additional file 8.** List of expressed recombinant antigens of *Eimeria tenella*, their gene accession numbers and used PCR primers.

| <i>E. tenella</i> antigen                        | GenBank accession   | Expression vector      | Restriction sites for cloning | PCR primers                  |
|--------------------------------------------------|---------------------|------------------------|-------------------------------|------------------------------|
| <i>EtMic1</i> (microneme protein) [13]           | AF032905<br>M73495A | pET16b<br>(Novagen)    | <i>NdeI-BamHI</i>             | Mic1-NdeI<br>Mic1-BamHI      |
| <i>EtMic2</i> (microneme protein) [14]           | Z71755              | PET21(+)<br>(Novagen)  | <i>NdeI-EagI</i>              | NdeI-Mic2<br>EagI-Mic2       |
| <i>EtMic3</i> (microneme protein) [11]           | AY512381            | pET16b<br>(Novagen)    | <i>NdeI-BamHI</i>             | Mic3-NdeI<br>Mic3-BamHI      |
| <i>EtMic5</i> fragment (microneme protein) [15]  | AJ245536            | pET22b(+)<br>(Novagen) | <i>NcoI-XhoI</i>              | Mic5-Nco2<br>Mic5-Xho2       |
| Eimepsin (aspartyl proteinase) [16]              | AJ293829            | pET22b(+)<br>(Novagen) | <i>EcoRI-XhoI</i>             | Eimep-EcoRI<br>Eimep-Xho2    |
| MZP 5-7 (merozoite antigen) [17]                 | L08257              | pET22b(+)<br>(Novagen) | <i>NcoI-XhoI</i>              | MZP-XhoI<br>MZP-BamHI        |
| 19 kDa Ag 3-1E (potential immunostimulator) [18] | AY745810            | pASK-IBA2<br>(IBA)     | <i>BsaI</i>                   | 3-1E Forward<br>3-1E Reverse |

PCR primers:

|              |                                             |
|--------------|---------------------------------------------|
| Mic1-NdeI    | 5'- AAGGTCGTCATATGGCGCCCCTTCCTCG            |
| Mic1-BamHI   | 5'- TTATGGATCCTTAGGATGCCACATCTCTG           |
| NdeIMic2     | 5'- CATTCCATATGGCTCGAGCG                    |
| EagIMic2     | 5'- GTCCCGGCCGATGACTGTTGAGTGTCAC            |
| Mic3-NdeI    | 5'- TCATTATTCATATGCGACTGAGCAGAAGTTTC        |
| Mic3-BamHI   | 5'- CATTGGATCCTCACAAATGTGGCCCTCTCCCC        |
| Mic5-Nco2    | 5'- ATGGCCATGGTGGAGACACAGTGG                |
| Mic5-Eco2    | 5'- GTGCACGAGGTACCCGAATCCCTGCG              |
| Eimep-EcoRI  | 5'- TCCGAATTCATGCGTTCCTTCTGGTCGTGG          |
| Eimep-Xho2   | 5'- TATCTCGAGAAAGGCCAGTGCGATTGC             |
| MZP-XhoI     | 5'- CGCTCTCGAGCTCGTCGTCCTCGTCGTCTCC         |
| MZP-BamHI    | 5'- ACGGATCCGATGGCTAAGTCTATG                |
| 3-1E Forward | 5'- ATGGTAGGTCTCAGGCCGAGAAGCAGACACCCAGGCC   |
| 3-1E Reverse | 5'- ATGGTAGGTCTCAGCGCTGAAGCCGACTGGTGAAGGTAC |
