# Supplementary material for: Antibody expressing pea seeds as fodder for prevention of gastrointestinal parasitic infections in chickens
Source: PubMed Central journal article supplement (PMC2755478; doi:10.1186/1472-6750-9-79), 2009-09-11
Supplement: 1472-6750-9-79-S9.pdf [file 1472-6750-9-79-S9.pdf]

**Additional file 9.** Characteristics of the binary vector used for pea transformation.

| <b>Genetic element</b> | <b>Size (bp)</b> | <b>Description</b>                                                                                      |
|------------------------|------------------|---------------------------------------------------------------------------------------------------------|
| pPZP200                | 6741             | High copy binary vector used for cloning of DNA sequences [62]                                          |
| USP+                   | 1191             | Elongated version of the Unknown Seed Protein (USP) promoter from <i>Vicia faba</i> [65]                |
| pPZP-USP+scFv          | variable         | Binary vector for plant transformation (target gene encodes scFv)                                       |
| UTR-LeB4               | 17               | 5'-untranslated region from legumin gene of <i>Vicia faba</i> [64]                                      |
| LeB4                   | 75               | Signal sequence for legumin from <i>Vicia faba</i> which targets to the endoplasmic reticulum (ER) [64] |
| HIS                    | 18               | Synthetic hexa histidine tag for purification purposes                                                  |
| KDEL                   | 12               | Synthetic ER-retention signal                                                                           |
| 35S terminator         | 225              | Terminator (poly A signal) from CaMV 35S transcript [66]                                                |
